# Supplementary material for: Flocculent VS nanoparticle aggregate-modified NiCo2S4 nanograss arrays for electrocatalytic water splitting
Source: Royal Society of Chemistry journal article supplement (doi:10.1039/d1se00485a), 2021-01-01
Supplement: d1se00485a1.pdf [file d1se00485a1.pdf]

Supporting information

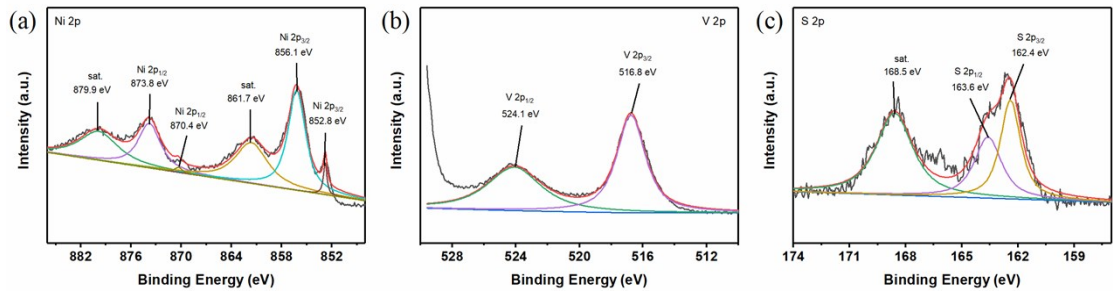

Figure S1. High-resolution XPS spectra of VS/Ni<sub>3</sub>S<sub>2</sub>/NF.

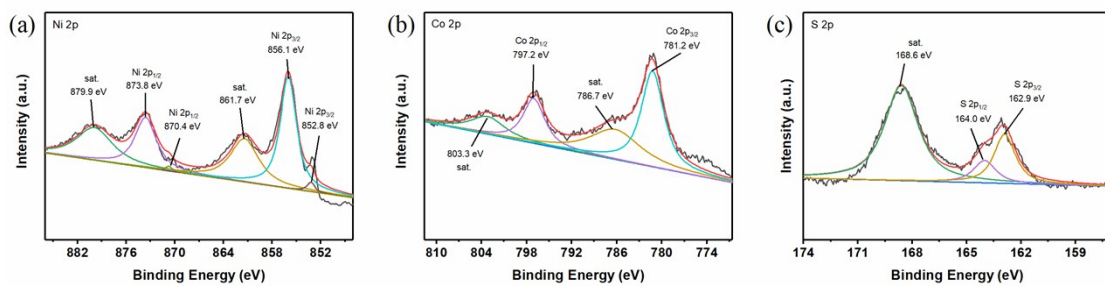

Figure S2. High-resolution XPS spectra of NiCo<sub>2</sub>S<sub>4</sub>/NF.

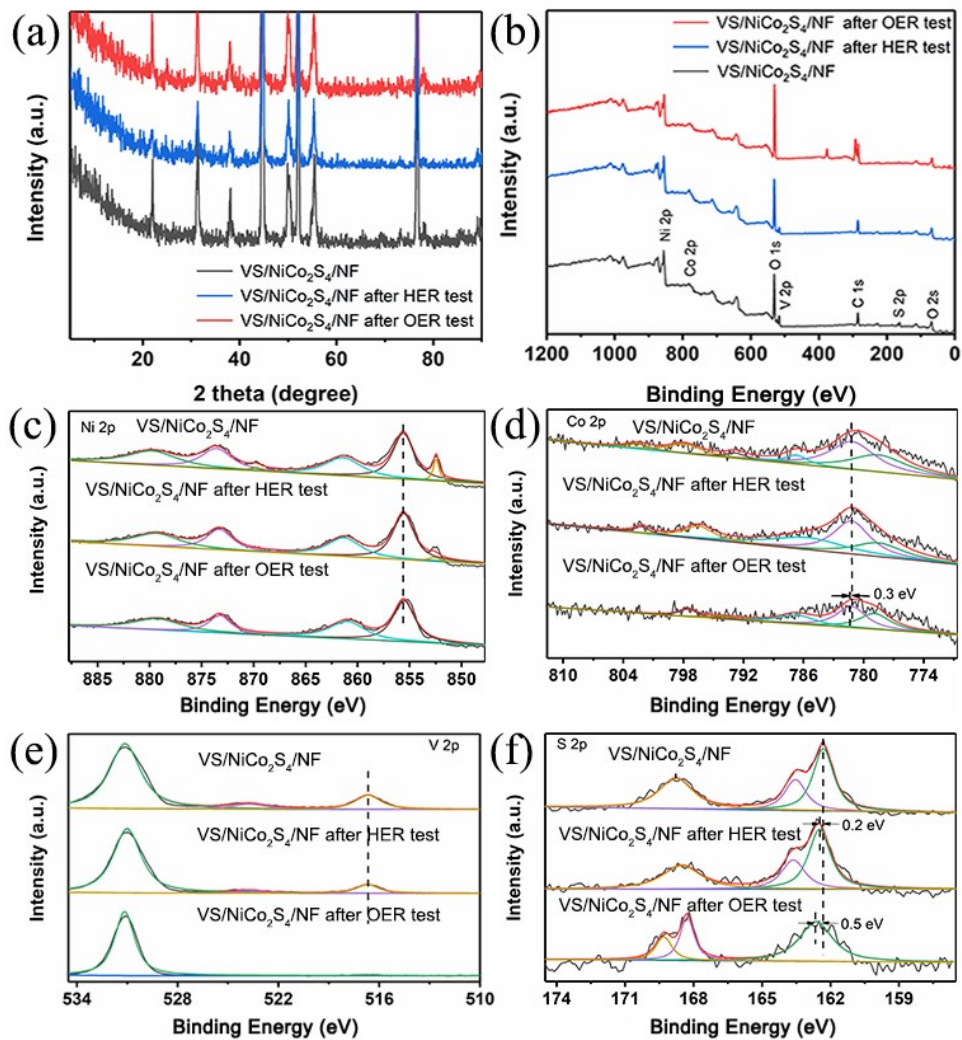

Figure S3. XRD patterns (a) and XPS spectra(b-f) of VS/NiCo<sub>2</sub>S<sub>4</sub>/NF after HER and OER long-term stability test.

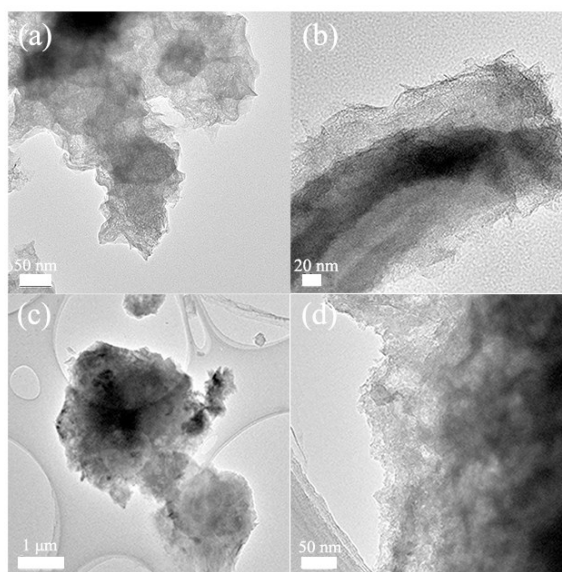

Figure S4. TEM images of VS/NiCo<sub>2</sub>S<sub>4</sub>/NF after HER (a, b) and OER (c, d) long-term stability test.

Table S1. Comparison of the OER activity over VS/NiCo<sub>2</sub>S<sub>4</sub>/NF with several Ni/Co-based electrocatalysts in alkaline media.

| Samples                                                | OER Overpotential /<br>current density<br>(mV/mA · cm <sup>-2</sup> ) | ref       |
|--------------------------------------------------------|-----------------------------------------------------------------------|-----------|
| VS/NiCo <sub>2</sub> S <sub>4</sub> /NF                | 332/50                                                                | This work |
| NiS/NF                                                 | 335/50                                                                | 1         |
| Ni <sub>3</sub> S <sub>2</sub> /FeS                    | 295/30                                                                | 2         |
| NiS/Ni                                                 | 301/10                                                                | 3         |
| NiCo <sub>2</sub> S <sub>4</sub> NA/CC                 | 336/20                                                                | 4         |
| Ni <sub>x</sub> Co <sub>3-x</sub> O <sub>4</sub>       | 337/10                                                                | 5         |
| NiCo <sub>2</sub> O <sub>4</sub> NRAs                  | 320/10                                                                | 6         |
| Co <sub>9</sub> S <sub>8</sub> @MoS <sub>2</sub> /CNFs | 361/10                                                                | 7         |
| CoMoS <sub>3</sub>                                     | 320/10                                                                | 8         |
| CoS                                                    | 310/10                                                                | 9         |

Table S2. Comparison of the HER activity over VS/NiCo<sub>2</sub>S<sub>4</sub>/NF with several Ni/Co-based electrocatalysts in alkaline media.

| Samples                                          | HER Overpotential/<br>current density<br>(mV/mA·cm <sup>-2</sup> ) | ref       |
|--------------------------------------------------|--------------------------------------------------------------------|-----------|
| VS/NiCo <sub>2</sub> S <sub>4</sub> /NF          | 184/10                                                             | This work |
| NiCo <sub>2</sub> S <sub>4</sub> nanotube        | 200/10                                                             | 10        |
| CoS <sub>x</sub> /Ni <sub>3</sub> S <sub>2</sub> | 204/10                                                             | 11        |
| NiS/Ni                                           | 161/10                                                             | 3         |
| Co <sub>9</sub> S <sub>8</sub> @NiCo LDH/NF      | 168/10                                                             | 12        |
| Ni <sub>x</sub> Co <sub>3-x</sub> O <sub>4</sub> | 155/10                                                             | 5         |
| NiCo <sub>2</sub> O <sub>4</sub> NRAs            | 156/10                                                             | 6         |
| FeS/NiS/NF                                       | 144/10                                                             | 13        |
| NiS/VS                                           | 158/10                                                             | 14        |
| Ni <sub>3</sub> S <sub>2</sub>                   | 300/10                                                             | 15        |

## Reference

1. W. Zhu, X. Yue, W. Zhang, S. Yu, Y. Zhang, J. Wang and J. Wang, *Chem. Commun.*, 2016, **52**, 1486-1489.
2. K. Xiao, J.-X. Wei, W.-K. Han and Z.-Q. Liu, *J. Power Sources*, 2021, **487**, 229408.
3. C. Yan, J. Huang, C. Wu, Y. Li, Y. Tan, L. Zhang, Y. Sun, X. Huang and J. Xiong, *J. Mater. Sci. Technol.*, 2020, **42**, 10-16.
4. D. Liu, Q. Lu, Y. Luo, X. Sun and A. M. Asiri, *Nanoscale*, 2015, **7**, 15122-15126.
5. X. Yan, K. Li, L. Lyu, F. Song, J. He, D. Niu, L. Liu, X. Hu and X. Chen, *ACS Appl. Mater. Interfaces*, 2016, **8**, 3208-3214.
6. B. Zhang, X. Zhang, Y. Wei, L. Xia, C. Pi, H. Song, Y. Zheng, B. Gao, J. Fu and P. K. Chu, *J. Alloys Compd.*, 2019, **797**, 1216-1223.
7. H. Zhu, J. Zhang, R. Yanzhang, M. Du, Q. Wang, G. Gao, J. Wu, G. Wu, M. Zhang, B. Liu, J. Yao and X. Zhang, *Adv. Mater*, 2015, **27**, 4752-4759.
8. J. Guo, X. Zhang, Y. Sun, L. Tang and X. Zhang, *J. Mater. Chem. A*, 2017, **5**, 11309-11315.
9. Y. Li, X. Fu, W. Zhu, J. Gong, J. Sun, D. Zhang and J. Wang, *Inorg. Chem. Front.*, 2019, **6**, 2090-2095.
10. J. Liu, J. Wang, B. Zhang, Y. Ruan, L. Lv, X. Ji, K. Xu, L. Miao and J. Jiang, *ACS Appl. Mater. Interfaces*, 2017, **9**, 15364-15372.
11. S. Shit, S. Chhetri, W. Jang, N. C. Murmu, H. Koo, P. Samanta and T. Kuila, *ACS Appl. Mater. Interfaces*, 2018, **10**, 27712-27722.
12. J. Yan, L. Chen and X. Liang, *Sci. Bull.*, 2019, **64**, 158-165.
13. R. Zhang, Z. Zhu, J. Lin, K. Zhang, N. Li and C. Zhao, *Electrochim. Acta*, 2020, **332**, 135534.
14. K. Bao, Y. Yan, T. Liu, T. Xu, J. Cao and J. Qi, *Inorg. Chem. Front.*, 2020, **7**, 4924-4929.
15. T. A. Ho, C. Bae, H. Nam, E. Kim, S. Y. Lee, J. H. Park and H. Shin, *ACS Appl. Mater. Interfaces*, 2018, **10**, 12807-12815.
